# Supplementary material
Source: publisher figshare collection journal article supplement (https://springernature.figshare.com/ndownloader/files/18045944)
Supplement: Supplementary file [file 18045944]

**A**

| Cells per injection | Tumor culture | 28 days | 35 days | 42 days | 49 days | 56 days | Days to growth at $\geq 0.1 \text{ cm}^3$ tumor |
|---------------------|---------------|---------|---------|---------|---------|---------|-------------------------------------------------|
| 50                  | U87MG         | (0/5)   | (0/5)   | (0/5)   | (0/5)   | (0/5)   | >56                                             |
|                     | U87-r#10      | (0/5)   | (0/5)   | (3/5)   | (3/5)   | (3/5)   | $56 \pm 3$                                      |
| 100                 | U87MG         | (0/4)   | (0/4)   | (1/4)   | (1/4)   | (1/4)   | >56                                             |
|                     | U87-r#10      | (0/4)   | (2/4)   | (4/4)   | (4/4)   | (4/4)   | $48 \pm 3$                                      |
| 250                 | U87MG         | (0/4)   | (0/4)   | (0/4)   | (2/4)   | (3/4)   | $56 \pm 4$                                      |
|                     | U87-r#10      | (0/4)   | (0/4)   | (3/4)   | (4/4)   | (4/4)   | $46 \pm 2$                                      |
| 500                 | U87MG         | (0/4)   | (0/4)   | (1/4)   | (2/4)   | (4/4)   | $49 \pm 2$                                      |
|                     | U87-r#10      | (0/4)   | (2/4)   | (4/4)   | (4/4)   | (4/4)   | $42 \pm 2$                                      |
| 1000                | U87MG         | (0/3)   | (1/3)   | (2/3)   | (3/3)   | (3/3)   | $46 \pm 2$                                      |
|                     | U87-r#10      | (1/3)   | (2/3)   | (3/3)   | (3/3)   | (3/3)   | $39 \pm 2$                                      |

**B**

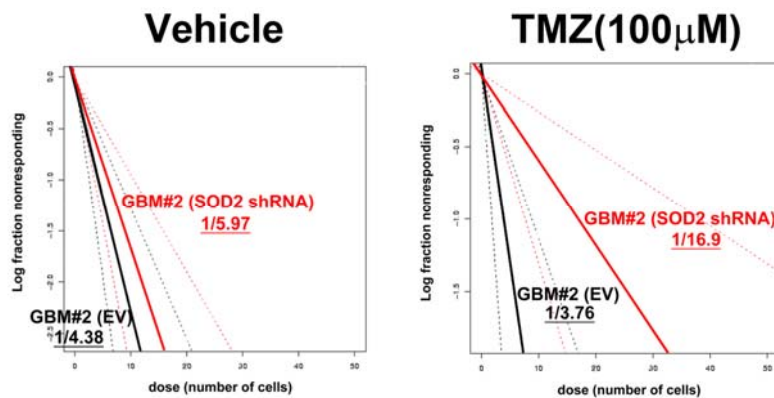

**Additional file 5: Figure S5.** The assays of tumor-initiating cell (TIC) properties. (A) Tumor formation analysis with limiting dilution (50~1000 cells per injection) of U87-parental and TMZ-resistant (r#10) cells in subcutaneous flank area of NOD-SCID mice was performed and recorded. Tumor formation was defined as the measurement to reach  $0.1 \text{ cm}^3$  or larger. The number of tumor formation in total implanted mice was shown in the brackets. (B) The frequency of the TIC-featuring population of GBM#2 (derived from another recurrent GBM patient) with or without TMZ treatment was estimated using the *in vitro* extreme limiting dilution assay.
